# Supplementary material for: The protocataclasite dilemma: in situ 36 Cl and REE-Y lessons from an impure limestone fault scarp at Sparta, Greece
Source: Copernicus journal article supplement (doi:10.5194/se-15-1343-2024), 2024-11-14
Supplement: Supplementary file 1 [file se-15-1343-2024-supplement.zip]

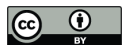

## *Supplement of*

# **The protocataclasite dilemma: in situ $^{36}\text{Cl}$ and REE-Y lessons from an impure limestone fault scarp at Sparta, Greece**

**Bradley W. Goodfellow et al.**

*Correspondence to:* Arjen P. Stroeven ([arjen.stroeven@natgeo.su.se](mailto:arjen.stroeven@natgeo.su.se))

- [se-15-1343-2024-supplement-title-page.pdf](#)
- [Figure S1\\_Sediment wedges.docx](#)
- [Figure S2\\_36Cl Pr 48\\_8 Results.docx](#)
- [Figure S3\\_Anogia B 36Cl Results.docx](#)
- [Figure S4\\_REY versus Al Si K in fault scarp and colluvium.docx](#)
- [Figure S5\\_REY versus major elements in the Kaparelli and Magnola fault colluvium.docx](#)
- [Table S1 Sparta Fault 36Cl data.docx](#)
- [Table S2\\_Bayesian MCMC model statistics.docx](#)
- [Table S3 Sparta fault scarp bulk chemistry.docx](#)
- [Table S4\\_Point counts of calcite and quartz from the Sparta fault scarp.docx](#)
- [Table S5 EDS measurements of element concentrations.docx](#)
- [Table S6\\_Sparta fault scarp trace elements.docx](#)
- [Table S7 Soil pH.docx](#)
- [Table S8 Soil bulk and trace chemistry.docx](#)

The copyright of individual parts of the supplement might differ from the article licence.
