# Supplementary material for: The protocataclasite dilemma: in situ 36 Cl and REE-Y lessons from an impure limestone fault scarp at Sparta, Greece
Source: Copernicus journal article supplement (doi:10.5194/se-15-1343-2024), 2024-11-14
Supplement: Supplementary file 2 [file Figure S1_Sediment wedges.docx]

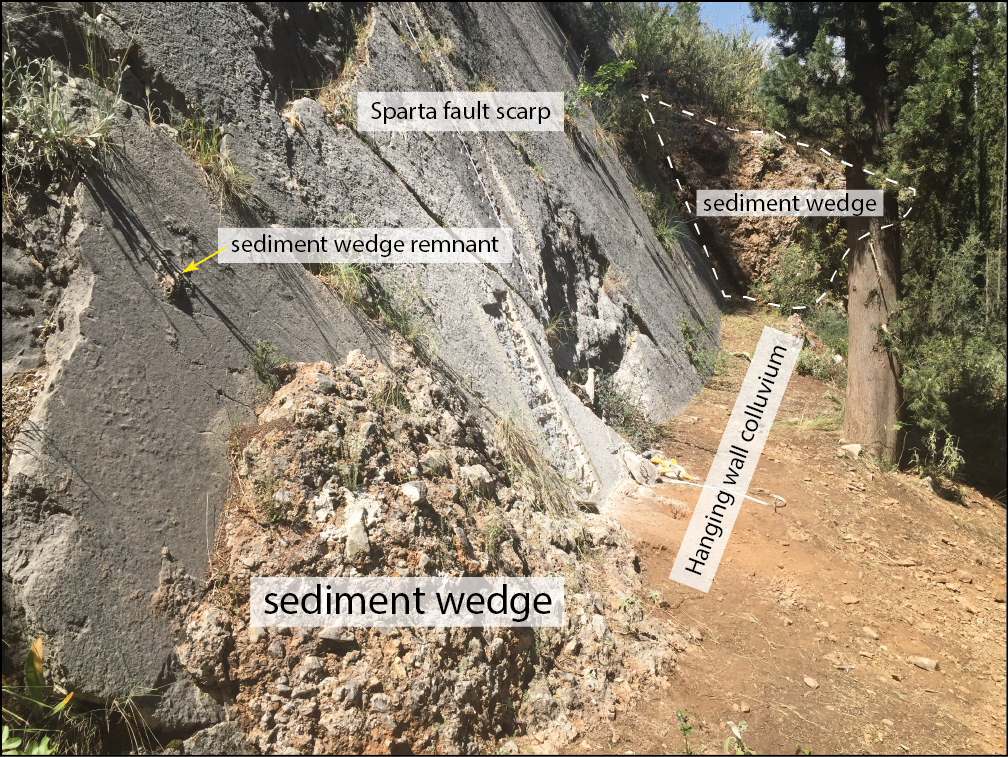


**Fig. S1:** Sediment wedges welded to the Sparta fault scarp at Anogia. In some cases, these are perched above the ground surface.
