# Supplementary material for: The protocataclasite dilemma: in situ 36 Cl and REE-Y lessons from an impure limestone fault scarp at Sparta, Greece
Source: Copernicus journal article supplement (doi:10.5194/se-15-1343-2024), 2024-11-14
Supplement: Supplementary file 8 [file Figure S4_REY versus Al Si K in fault scarp and colluvium.docx]

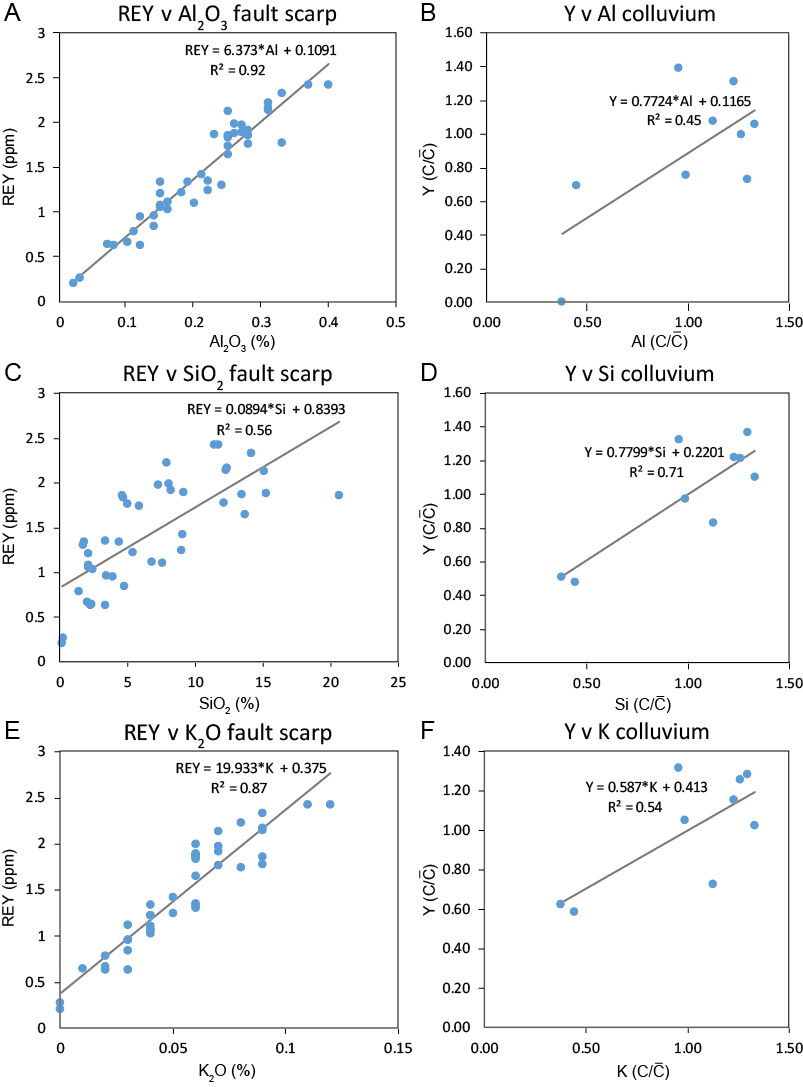


**Fig. S4:** Mean REY concentrations versus Al2O3, SiO2, and K2O (left panels) on the Sparta fault scarp (measured using laboratory XRF) and Y versus Al, Si, and K (right panels) in hanging wall colluvium (measured using a handheld XRF device and all concentrations have been normalized through division by mean concentration).
