# Supplementary material for: The protocataclasite dilemma: in situ 36 Cl and REE-Y lessons from an impure limestone fault scarp at Sparta, Greece
Source: Copernicus journal article supplement (doi:10.5194/se-15-1343-2024), 2024-11-14
Supplement: Supplementary file 10 [file Figure S5_REY versus major elements in the Kaparelli and Magnola fault colluvium.docx]

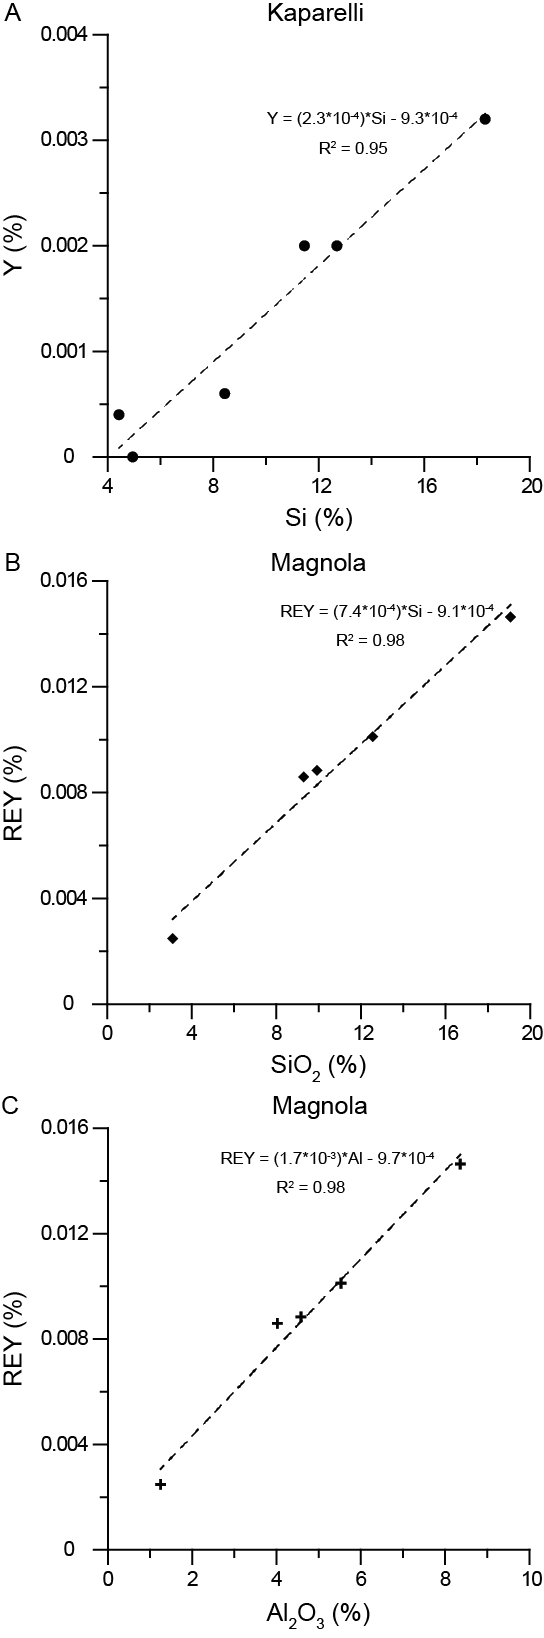


**Fig. S5:** REY versus major elements for (A) the Kaparelli fault hanging wall colluvium, and (B and C) the Magnola fault hanging wall colluvium from the Manighetti et al. (2010) electronic appendix.
