# Supplementary material for: The protocataclasite dilemma: in situ 36 Cl and REE-Y lessons from an impure limestone fault scarp at Sparta, Greece
Source: Copernicus journal article supplement (doi:10.5194/se-15-1343-2024), 2024-11-14
Supplement: Supplementary file 12 [file Table S1 Sparta Fault 36Cl data.docx]

| Sample ID | Height above soil (cm) | Sample thickness  (cm) | Sample Mass  (g) | Dilution Spike  (mg) | 36Cl Ratio   (x10-15) | 1σ | 35Cl/37Cl | 1σ | 36Cl  (at/g rock) | 1σ | Chloride in rock (ppm) | 1σ |
| --- | --- | --- | --- | --- | --- | --- | --- | --- | --- | --- | --- | --- |
| Ano16A01 | 0-10 | 3 | 30.305 | 1.090 | 137.4 | 5.0 | 75.5 | 2.0 | 86 822 | 3 384 | 0.64 | 0.07 |
| Ano16A02 | 10-20 | 3 | 30.478 | 1.078 | 136.6 | 5.0 | 70.6 | 3.1 | 85 143 | 3 332 | 0.77 | 0.10 |
| Ano16A03 | 20-30 | 3 | 30.292 | 1.064 | 145.3 | 5.0 | 77.6 | 2.5 | 89 593 | 3 293 | 0.55 | 0.08 |
| Ano16A04 | 30-40 | 3 | 30.272 | 1.090 | 139.2 | 5.1 | 64.3 | 1.8 | 88 901 | 3 482 | 1.02 | 0.08 |
| Ano16A05 | 40-50 | 3 | 30.611 | 1.111 | 130.9 | 5.0 | 69.7 | 0.6 | 83 768 | 3 389 | 0.84 | 0.04 |
| Ano16A06 | 50-60 | 3 | 30.429 | 1.070 | 138.8 | 4.8 | 85.2 | 0.7 | 85 156 | 3 185 | 0.37 | 0.04 |
| Ano16A07 | 60-70 | 3 | 30.266 | 1.080 | 143.5 | 5.6 | 81.2 | 2.6 | 89 579 | 3 712 | 0.48 | 0.07 |
| Ano16A08 | 70-80 | 3 | 30.312 | 1.072 | 143.0 | 5.2 | 87.5 | 1.5 | 88 595 | 3 289 | 0.26 | 0.05 |
| Ano16A09 | 80-90 | 3 | 30.304 | 1.054 | 150.8 | 5.2 | 91.2 | 1.4 | 91 749 | 3 257 | 0.16 | 0.04 |
| Ano16A10 | 90-100 | 3 | 30.616 | 1.070 | 164.4 | 5.5 | 85.0 | 4.5 | 100 965 | 3 447 | 0.30 | 0.10 |
| Ano16A11 | 100-110 | 3 | 30.052 | 1.059 | 158.9 | 5.2 | 76.2 | 1.5 | 98 867 | 3 337 | 0.51 | 0.05 |
| Ano16A11B | 100-110 | 3 | 30.104 | 1.090 | 150.7 | 5.3 | 88.2 | 1.5 | 95 591 | 3 449 | 0.26 | 0.05 |
| Ano16A12 | 110-120 | 3 | 30.024 | 1.192 | 144.2 | 5.7 | 57.5 | 1.8 | 100 194 | 4 493 | -0.10 | 0.23 |
| Ano16A13 | 120-130 | 3 | 30.014 | 1.096 | 166.6 | 5.5 | 78.5 | 1.3 | 107 407 | 3 612 | 0.50 | 0.05 |
| Ano16A14 | 130-140 | 3 | 30.038 | 1.188 | 149.0 | 8.5 | 37.0 | 3.9 | 107 893 | 6 767 | 1.80 | 0,60 |
| Ano16A15 | 140-150 | 3 | 30.324 | 1.088 | 163.1 | 5.4 | 78.1 | 0.4 | 103 366 | 3 518 | 0.49 | 0.03 |
| Ano16A16 | 150-160 | 3 | 30.108 | 1.198 | 162.4 | 9.1 | 38.2 | 8.3 | 118 276 | 7 765 | 1.60 | 1.13 |
| Ano16A17 | 160-170 | 3 | 30.418 | 1.068 | 178.4 | 6.1 | 76.1 | 0.5 | 110 547 | 3 863 | 0.63 | 0.03 |
| Ano16A18 | 170-180 | 3 | 30.057 | 1.171 | 152.6 | 9.2 | 40.5 | 3.7 | 107 771 | 7 087 | 1.20 | 0.48 |
| Ano16A19 | 180-190 | 3 | 30.483 | 1.078 | 182.7 | 5.8 | 74.1 | 0.2 | 114 279 | 3 718 | 0.70 | 0.03 |
| Ano16A20 | 190-200 | 3 | 30.102 | 1.165 | 157.7 | 10.6 | 42.9 | 2.1 | 110 093 | 7 912 | 1.00 | 0.29 |
| Ano16A21 | 200-210 | 3 | 30.185 | 1.054 | 184.7 | 6.9 | 79.6 | 1.4 | 113 534 | 4 354 | 0.52 | 0.04 |
| Ano16A22 | 210-220 | 3 | 30.164 | 1.174 | 165.9 | 8.4 | 46.1 | 2.1 | 115 815 | 6 349 | 0.70 | 0.28 |
| Ano16A23 | 220-230 | 3 | 30.225 | 1.060 | 185.7 | 6.4 | 55.2 | 0.8 | 117 520 | 4 114 | 1.41 | 0.05 |
| Ano16A24 | 230-240 | 3 | 30.134 | 1.146 | 151.5 | 7.0 | 46.2 | 1.9 | 102 954 | 5 255 | 0.60 | 0.26 |
| Ano16A25 | 240-250 | 3 | 30.553 | 1.030 | 205.7 | 8.0 | 63.0 | 2.6 | 123 970 | 4 894 | 0.99 | 0.10 |
| Ano16A26 | 250-260 | 3 | 30.138 | 1.135 | 188.8 | 12.0 | 36.7 | 4.4 | 130 792 | 9 142 | 1.70 | 1.02 |
| Ano16A27 | 260-270 | 3 | 30.290 | 1.060 | 186.7 | 7.1 | 25.2 | 0.2 | 129 775 | 4 995 | 5.18 | 0.05 |
| Ano16A28 | 270-280 | 3 | 30.267 | 1.122 | 182.5 | 6.5 | 53.9 | 5.2 | 119 485 | 5 080 | 0.20 | 0.87 |
| Ano16A29 | 280-290 | 3 | 30.216 | 1.054 | 206.9 | 8.3 | 73.0 | 1.2 | 127 932 | 5 214 | 0.70 | 0.05 |
| Ano16A30 | 290-300 | 3 | 30.201 | 1.130 | 194.2 | 6.7 | 60.3 | 2.0 | 127 511 | 5 100 | -0.20 | 0.82 |
| Ano16A31 | 300-310 | 3 | 30.396 | 1.063 | 237.7 | 9.9 | 74.7 | 0.5 | 147 335 | 6 199 | 0.66 | 0.03 |
| Ano16A32 | 310-320 | 3 | 30.162 | 1.143 | 199.2 | 7.4 | 56.8 | 2.2 | 133 273 | 5 640 | 0.00 | 0.82 |
| Ano16A33 | 320-330 | 3 | 30.411 | 1.070 | 213.1 | 8.6 | 62.7 | 0.6 | 134 199 | 5 517 | 1.08 | 0.04 |
| Ano16A35 | 340-350 | 3 | 30.766 | 1.101 | 203.6 | 11.2 | 39.5 | 1.7 | 136 346 | 7 600 | 2.43 | 0.21 |
| Ano16A37 | 360-370 | 3 | 30.252 | 1.137 | 203.9 | 10.4 | 54.8 | 1.4 | 139 118 | 7 183 | 1.33 | 0.12 |
| Ano16A39 | 380-390 | 3 | 29.963 | 1.051 | 234.9 | 9.6 | 56.1 | 1.7 | 149 444 | 6 161 | 1.09 | 0.12 |
|  |  |  |  |  |  |  |  |  |  |  |  |  |
| Ano16B01 | 0-10 | 3 | 30.370 | 1.095 | 130.9 | 5.1 | 47.3 | 0.9 | 86 315 | 3 448 | 1.73 | 0.11 |
| Ano16B02 | 10-20 | 3 | 30.160 | 1.139 | 129.7 | 5.5 | 51.4 | 3.3 | 85 529 | 4 524 | 0.30 | 0.84 |
| Ano16B03 | 20-30 | 3 | 30.202 | 1.071 | 137.2 | 5.0 | 55.6 | 0.4 | 87 763 | 3 249 | 1.15 | 0.09 |
| Ano16B04 | 30-40 | 3 | 30.040 | 1.139 | 130.5 | 6.0 | 50.6 | 5.5 | 86 591 | 4 897 | 0.40 | 0.90 |
| Ano16B05 | 40-50 | 3 | 30.340 | 1.079 | 128.6 | 4.5 | 71.2 | 1.0 | 81 065 | 2 937 | 0.52 | 0.09 |
| Ano16B06 | 50-60 | 3 | 30.088 | 1.156 | 107.0 | 5.3 | 35.8 | 0.9 | 77 461 | 3 928 | 1.20 | 0.25 |
| Ano16B07 | 60-70 | 3 | 29.945 | 1.107 | 128.9 | 4.4 | 66.7 | 0.4 | 84 770 | 2 955 | 0.73 | 0.09 |
| Ano16B08 | 70-80 | 3 | 30.070 | 1.164 | 111.5 | 5.7 | 33.4 | 0.3 | 82 072 | 4 266 | 1.60 | 0.22 |
| Ano16B09 | 80-90 | 3 | 30.847 | 1.051 | 143.5 | 4.9 | 80.1 | 0.3 | 85 811 | 3 013 | 0.76 | 0.02 |
| Ano16B10 | 90.100 | 3 | 30.196 | 1.165 | 125.8 | 6.2 | 40.9 | 0.7 | 90 159 | 4 516 | 0.60 | 0.22 |
| Ano16B11 | 100-110 | 3 | 30.078 | 1.073 | 142.1 | 4.0 | 90.1 | 1.4 | 88 467 | 2 557 | 0.58 | 0.03 |
| Ano16B12 | 110-120 | 3 | 30.079 | 1.146 | 126.7 | 5.7 | 36.7 | 1.1 | 90 865 | 4 173 | 1.00 | 0.26 |
| Ano16B13 | 120-130 | 3 | 30.155 | 1.063 | 148.8 | 4.6 | 76.1 | 2.8 | 92 436 | 2 942 | 0.89 | 0.08 |
| Ano16B14 | 130-140 | 3 | 30.221 | 1.165 | 139.2 | 5.4 | 38.4 | 1.0 | 100 544 | 3 983 | 0.90 | 0.25 |
| Ano16B15 | 140-150 | 3 | 30.411 | 1.077 | 157.9 | 5.5 | 84.7 | 0.3 | 98 068 | 3 495 | 0.69 | 0.02 |
| Ano16B16 | 150-160 | 3 | 30.108 | 1.139 | 123.4 | 5.7 | 34.7 | 0.1 | 88 432 | 4 202 | 1.30 | 0.21 |
| Ano16B17 | 160-170 | 3 | 30.599 | 1.028 | 183.6 | 6.4 | 80.2 | 0.3 | 108 662 | 3 892 | 0.73 | 0.02 |
| Ano16B19 | 180-190 | 3 | 30.210 | 1.052 | 172.4 | 6.4 | 63.8 | 0.4 | 107 155 | 4 038 | 1.27 | 0.02 |
| Ano16B20 | 190-200 | 3 | 30.078 | 1.065 | 182.1 | 5.4 | 68.3 | 0.9 | 114 685 | 3 457 | 1.14 | 0.04 |
|  |  |  |  |  |  |  |  |  |  |  |  |  |
| SFT-C-2 | 640 | 2.5 | 25.462 | 0.947 | 364.8 | 10.6 | 62.1 | 0.5 | 262 122 | 7 317 | -0.20 | 0.05 |
| SFT-C-3 | 600 | 2.5 | 43.913 | 0.951 | 650.3 | 18.1 | 44.4 | 0.3 | 244 909 | 7 170 | 0.60 | 0.03 |
| SFT-C-4 | 560 | 2.5 | 49.595 | 0.951 | 592.5 | 16.3 | 37.6 | 0.3 | 215 122 | 5 950 | 0.90 | 0.03 |
| SFT-C-6 | 480 | 2.5 | 48.402 | 0.939 | 445.2 | 15.3 | 32.5 | 0.8 | 166 420 | 5 779 | 1.30 | 0.07 |
| SFT-C-8 | 400 | 2.5 | 51.365 | 0.931 | 371.5 | 10.2 | 25.0 | 0.3 | 135 244 | 3 756 | 2.10 | 0.05 |
| SFT-C-10 | 320 | 2.5 | 51.420 | 0.953 | 310.4 | 9.1 | 27.7 | 0.4 | 113 401 | 3 358 | 1.70 | 0.06 |
| SFT-C-12 | 240 | 2.5 | 35.771 | 0.952 | 216.8 | 7.1 | 42.0 | 0.1 | 107 369 | 3 583 | 0.90 | 0.03 |
| SFT-C-14 | 160 | 2.5 | 46.600 | 0.952 | 264.7 | 8.0 | 57.2 | 0.4 | 98 032 | 2 994 | 0.10 | 0.02 |
| SFT-C-15 | 120 | 2.5 | 43.719 | 0.951 | 230.2 | 7.0 | 64.4 | 1.5 | 89 940 | 2 788 | -0.10 | 0.04 |
| SFT-C-16 | 80 | 2.5 | 29.303 | 0.945 | 145.6 | 5.2 | 63.8 | 0.6 | 84 021 | 3 106 | -0.20 | 0.04 |
| SF3-20 | -20 | 2.5 | 39.696 | 0.949 | 185.5 | 6.7 | 55.1 | 0.2 | 80 413 | 2 964 | 0.10 | 0.03 |
| SF3-40 | -40 | 2.5 | 35.979 | 0.954 | 156.1 | 5.7 | 48.0 | 0.2 | 75 835 | 2 850 | 0.50 | 0.03 |
| SF3-60 | -60 | 2.5 | 39.462 | 0.956 | 149.2 | 5.0 | 28.8 | 1.0 | 70 417 | 2 439 | 2.10 | 0.16 |
| SF3-80 | -80 | 2.5 | 59.575 | 0.954 | 212.1 | 6.5 | 22.7 | 0.2 | 69 225 | 2 143 | 2.20 | 0.03 |

All samples have a shielding value of 0.713160791, calculated using the online Topographic shielding calculator in CRONUS-Earth https://stoneage.ice-d.org/math/skyline/skyline_in.html

Even numbered samples from Ano16A12 to Ano16A32 and from Ano16B02 to Ano16B16 underwent AMS measurement in 2021. SFT and SF3 samples underwent AMS measurement in 2014. All other samples underwent AMS measurement in 2019.
