# Supplementary material for: The protocataclasite dilemma: in situ 36 Cl and REE-Y lessons from an impure limestone fault scarp at Sparta, Greece
Source: Copernicus journal article supplement (doi:10.5194/se-15-1343-2024), 2024-11-14
Supplement: Supplementary file 18 [file Table S4_Point counts of calcite and quartz from the Sparta fault scarp.docx]

**Table S4:** Point counts of calcite and quartz in thin sections from the Sparta fault scarp at Anogia.

| **Height on scarp (m)** | **Quartz** | **Calcite** | **Total counts** |  | **Height on scarp (m)** | **Quartz** | **Calcite** | **Total counts** |
| --- | --- | --- | --- | --- | --- | --- | --- | --- |
| -0.7 | 15 | 985 | 1000 |  | 3.1 | 15 | 985 | 1000 |
| -0.5 | 94 | 906 | 1000 |  | 3.3 | 26 | 974 | 1000 |
| -0.3 | 53 | 947 | 1000 |  | 3.5 | 55 | 945 | 1000 |
| -0.1 | 54 | 946 | 1000 |  | 3.7 | 27 | 973 | 1000 |
| 0.1 | 51 | 949 | 1000 |  | 3.9 | 54 | 946 | 1000 |
| 0.3 | 60 | 940 | 1000 |  | 4.1 | 58 | 942 | 1000 |
| 0.5 | 48 | 952 | 1000 |  | 4.3 | 47 | 953 | 1000 |
| 0.7 | 53 | 947 | 1000 |  | 4.5 | 69 | 931 | 1000 |
| 0.9 | 94 | 906 | 1000 |  | 4.7 | 151 | 849 | 1000 |
| 1.1 | 34 | 966 | 1000 |  | 4.9 | 88 | 912 | 1000 |
| 1.3 | 54 | 946 | 1000 |  | 5.1 | 61 | 939 | 1000 |
| 1.5 | 21 | 979 | 1000 |  | 5.3 | 1 | 999 | 1000 |
| 1.7 | 16 | 984 | 1000 |  | 5.5 | 20 | 980 | 1000 |
| 1.9 | 71 | 929 | 1000 |  | 5.7 | 56 | 944 | 1000 |
| 2.1 | 40 | 960 | 1000 |  | 5.9 | 113 | 887 | 1000 |
| 2.3 | 23 | 977 | 1000 |  | 6.1 | 63 | 937 | 1000 |
| 2.5 | 10 | 990 | 1000 |  | 6.3 | 154 | 846 | 1000 |
| 2.7 | 11 | 989 | 1000 |  | 6.5 | 55 | 945 | 1000 |
| 2.9 | 14 | 986 | 1000 |  | 6.7 | 61 | 939 | 1000 |
|  |  |  |  |  | Mean | 52 | 948 |  |
