# Supplementary material for: The protocataclasite dilemma: in situ 36 Cl and REE-Y lessons from an impure limestone fault scarp at Sparta, Greece
Source: Copernicus journal article supplement (doi:10.5194/se-15-1343-2024), 2024-11-14
Supplement: Supplementary file 24 [file Table S7 Soil pH.docx]

Table S7: Soil pH values from the Sparta fault hanging wall at Anogia. Indicator strips were used to measure pH from soil mixed with either a 1:1 mass ratio of soil:distilled water or soil:1M KCla.

| **Height (m)** | **pH (H2O)** | **pH (KCl)** |
| --- | --- | --- |
| 0 | 6.7-7.0 | 6.7-7.0 |
| -0.1 | 6.4 | 6.7 |
| -0.2 | 6.7 | 6.4-6.7 |
| -0.3 | 5.4-5.8 | 6.2-6.4 |
| -0.4 | 6.2-6.7 | 6.2-6.7 |
| -0.5 | 6.2 | 6.2 |
| -0.6 | 6.7-7.0 | 6.4 |
| -0.7 | 6.7-7.0 | 7.0 |

aSikora, F.J., and Moore, K.P. (Eds.), 2014. Soil Test Methods From the Southeastern United States. Southern Cooperative Series Bulletin 419, 211 p.
